# Supplementary material for: Genome-wide identification of evolutionarily conserved Small Heat-Shock and eight other proteins bearing α-crystallin domain-like in kinetoplastid protists
Source: PubMed Central journal article supplement (PMC6197667; doi:10.1371/journal.pone.0206012), 2018-10-22

# NudC1 homologs

Angomonas desouzai  
Angomonas deanei  
Leptomonas costaricensis  
Crithidia fasciculata  
Leishmania braziliensis  
Leishmania mexicana  
Trypanosoma ralphi  
Trypanosoma sp TCC878  
Trypanosoma cruzi  
Trypanosoma lewisi  
Trypanosoma brucei  
Trypanosoma grayi  
Trypanosoma vivax  
Trypanosoma sp TCC339  
Phytomonas serpens  
Herpetomonas muscarum  
Angomonas deanei  
Endotrypanum schaudinni  
Leishmania major  
Bodo saltans  
Bodo sp  
ParaBodo caudatus  
XP\_008879598.1|Aphanomyces  
ETL31708.1|Phytophthora  
XP\_013233790.1|Eimeria tenella  
XP\_002368217.1|Toxoplasma gondii  
XP\_003883577.1|Neospora caninum  
XP\_013436709.1|Eimeria necatrix  
XP\_726864.1|Plasmodium yoelii  
XP\_008815682.1|Plasmodium inui  
XP\_002259979.1|Plasmodium knowlesi  
XP\_002141127.1|Cryptosporidium muris  
XP\_008882748.1|Hammondia hammondi  
NP\_001084961.1|Xenopus laevis  
XP\_006270261.2|Alligator mississippiensis  
XP\_015264922.1|Gekko japonicus  
XP\_003227510.1|Anolis carolinensis  
XP\_005427196.1|Geospiza fortis  
NP\_058967.1|Rattus norvegicus  
NP\_001069075.1|Bos taurus  
XP\_006055533.1|Bubalus bubalis  
XP\_004478818.1|Dasyus novemcinctus  
XP\_013115147.1|Stomoxys calcitrans  
XP\_005181854.1|Musca domestica  
XP\_014239874.1|Cimex lectularius  
NP\_006591.1|Homo sapiens  
EFC40417.1|Naegleria gruberi  
P17624.1|Aspergillus nidulans

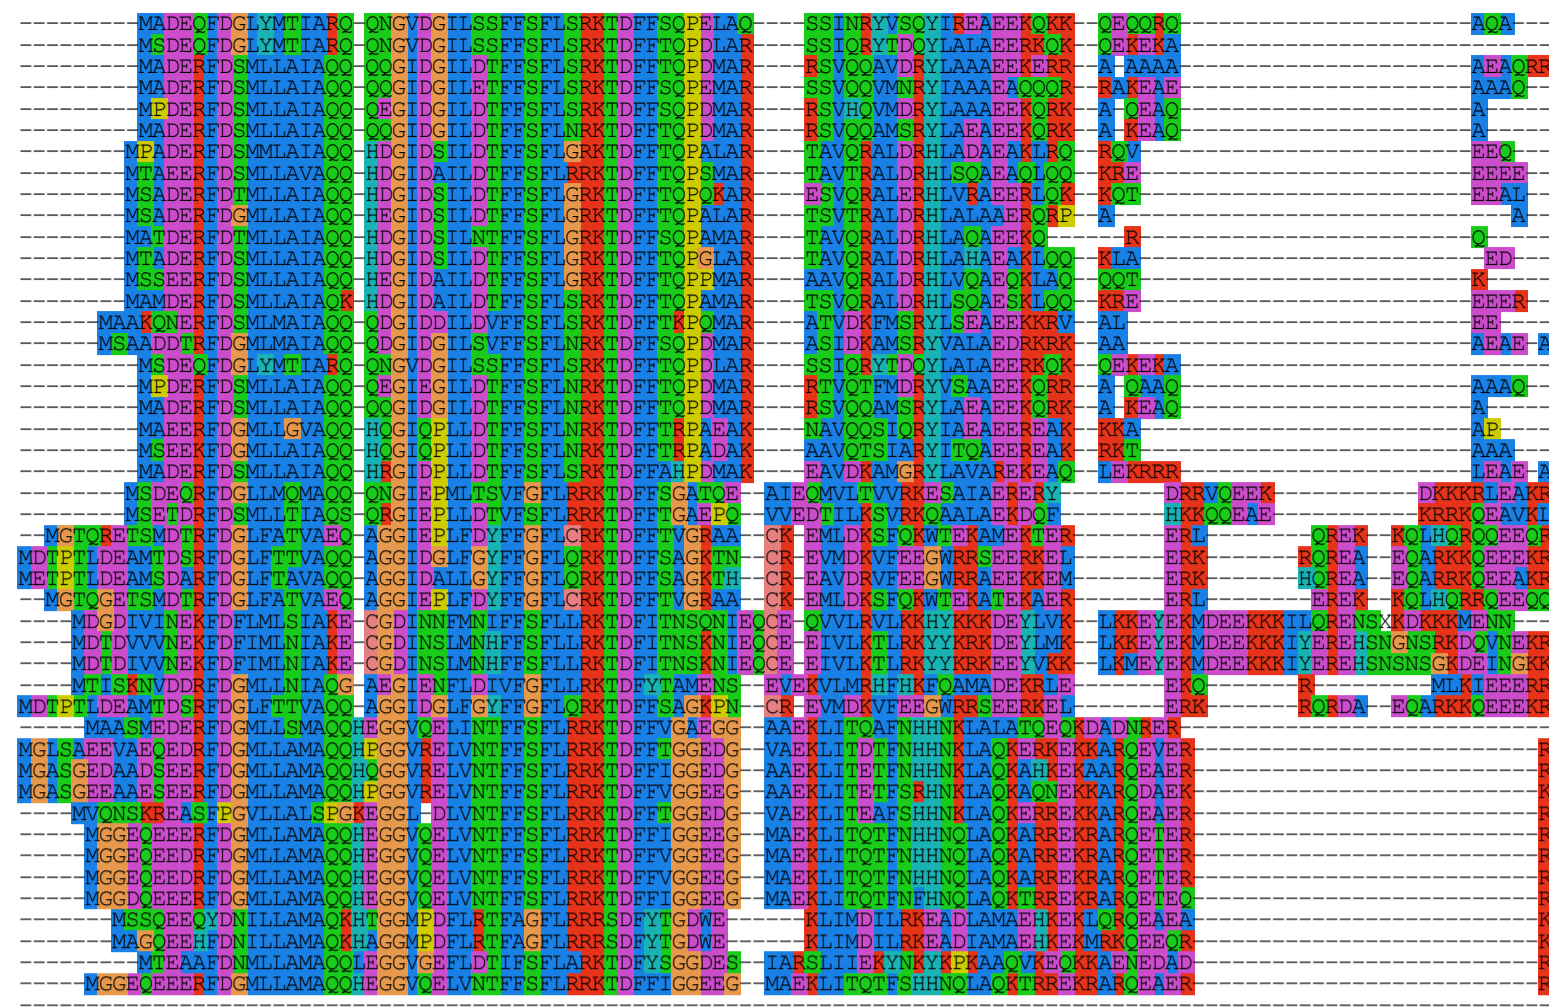

Angomonas desouzai  
Angomonas deanei  
Leptomonas costaricensis  
Crithidia fasciculata  
Leishmania braziliensis  
Leishmania mexicana  
Trypanosoma ralphi  
Trypanosoma sp TCC878  
Trypanosoma cruzi  
Trypanosoma lewisi  
Trypanosoma brucei  
Trypanosoma grayi  
Trypanosoma vivax  
Trypanosoma sp TCC339  
Phytomonas serpens  
Herpetomonas muscarum  
Angomonas deanei  
Endotrypanum schaudinni  
Leishmania major  
Bodo saltans  
Bodo sp  
ParaBodo caudatus  
XP\_008879598.1|Aphanomyces  
ETL31708.1|Phytophthora  
XP\_013233790.1|Eimeria tenella  
XP\_002368217.1|Toxoplasma gondii  
XP\_003883577.1|Neospora caninum  
XP\_013436709.1|Eimeria necatrix  
XP\_726864.1|Plasmodium yoelii  
XP\_008815682.1|Plasmodium inui  
XP\_002259979.1|Plasmodium knowlesi  
XP\_002141127.1|Cryptosporidium muris  
XP\_008882748.1|Hammondia hammondi  
NP\_001084961.1|Xenopus laevis  
XP\_006270261.2|Alligator mississippiensis  
XP\_015264922.1|Gekko japonicus  
XP\_003227510.1|Anolis carolinensis  
XP\_005427196.1|Geospiza fortis  
NP\_058967.1|Rattus norvegicus  
NP\_001069075.1|Bos taurus  
XP\_006055533.1|Bubalus bubalis  
XP\_004478818.1|Dasyus novemcinctus  
XP\_013115147.1|Stomoxys calcitrans  
XP\_005181854.1|Musca domestica  
XP\_014239874.1|Cimex lectularius  
NP\_006591.1|Homo sapiens  
EFC40417.1|Naegleria gruberi  
P17624.1|Aspergillus nidulans

116

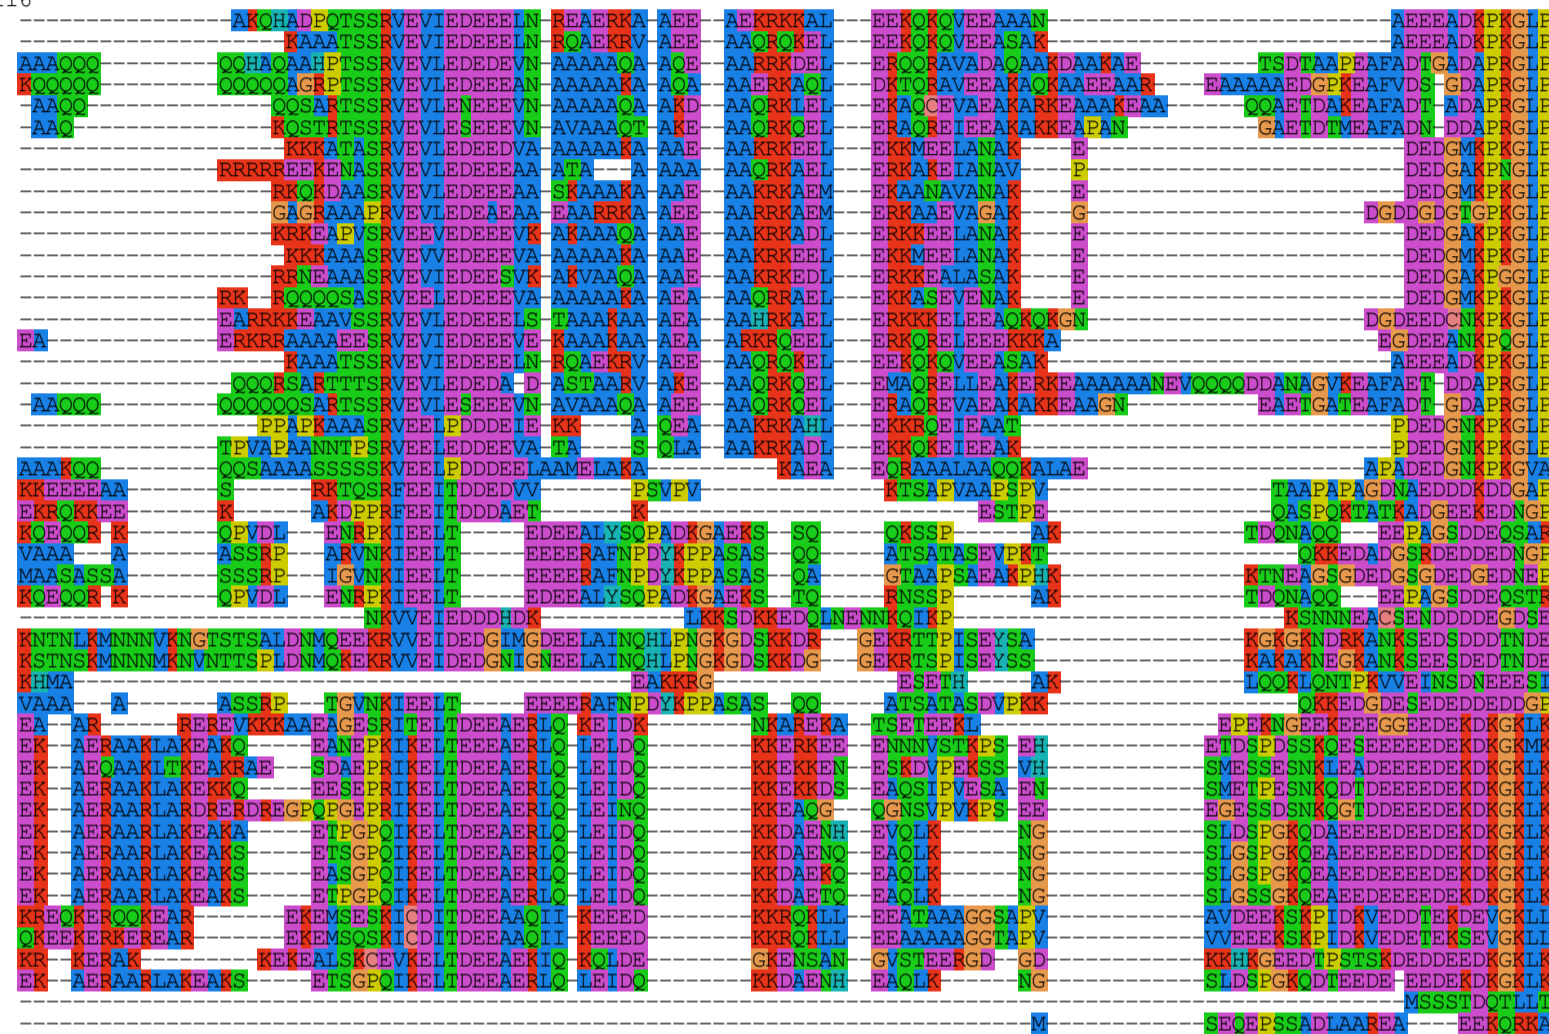

Angomonas desouzai  
Angomonas deanei  
Leptomonas costaricensis  
Crithidia fasciculata  
Leishmania braziliensis  
Leishmania mexicana  
Trypanosoma ralphi  
Trypanosoma sp TCC878  
Trypanosoma cruzi  
Trypanosoma lewisi  
Trypanosoma brucei  
Trypanosoma grayi  
Trypanosoma vivax  
Trypanosoma sp TCC339  
Phytomonas serpens  
Herpetomonas muscarum  
Angomonas deanei  
Endotrypanum schaudinni  
Leishmania major  
Bodo saltans  
Bodo sp  
ParaBodo caudatus  
XP\_008879598.1|Aphanomyces  
ETL31708.1|Phytophthora  
XP\_013233790.1|Eimeria tenella  
XP\_002368217.1|Toxoplasma gondii  
XP\_003883577.1|Neospora caninum  
XP\_013436709.1|Eimeria necatrix  
XP\_726864.1|Plasmodium yoelii  
XP\_008815682.1|Plasmodium inui  
XP\_002259979.1|Plasmodium knowlesi  
XP\_002141127.1|Cryptosporidium muris  
XP\_008882748.1|Hammondia hammondi  
NP\_001084961.1|Xenopus laevis  
XP\_006270261.2|Alligator mississippiensis  
XP\_015264922.1|Gekko japonicus  
XP\_003227510.1|Anolis carolinensis  
XP\_005427196.1|Geospiza fortis  
NP\_058967.1|Rattus norvegicus  
NP\_001069075.1|Bos taurus  
XP\_006055533.1|Bubalus bubalis  
XP\_004478818.1|Dasyus novemcinctus  
XP\_013115147.1|Stomoxys calcitrans  
XP\_005181854.1|Musca domestica  
XP\_014239874.1|Cimex lectularius  
NP\_006591.1|Homo sapiens  
EFC40417.1|Naegleria gruberi  
P17624.1|Aspergillus nidulans

231

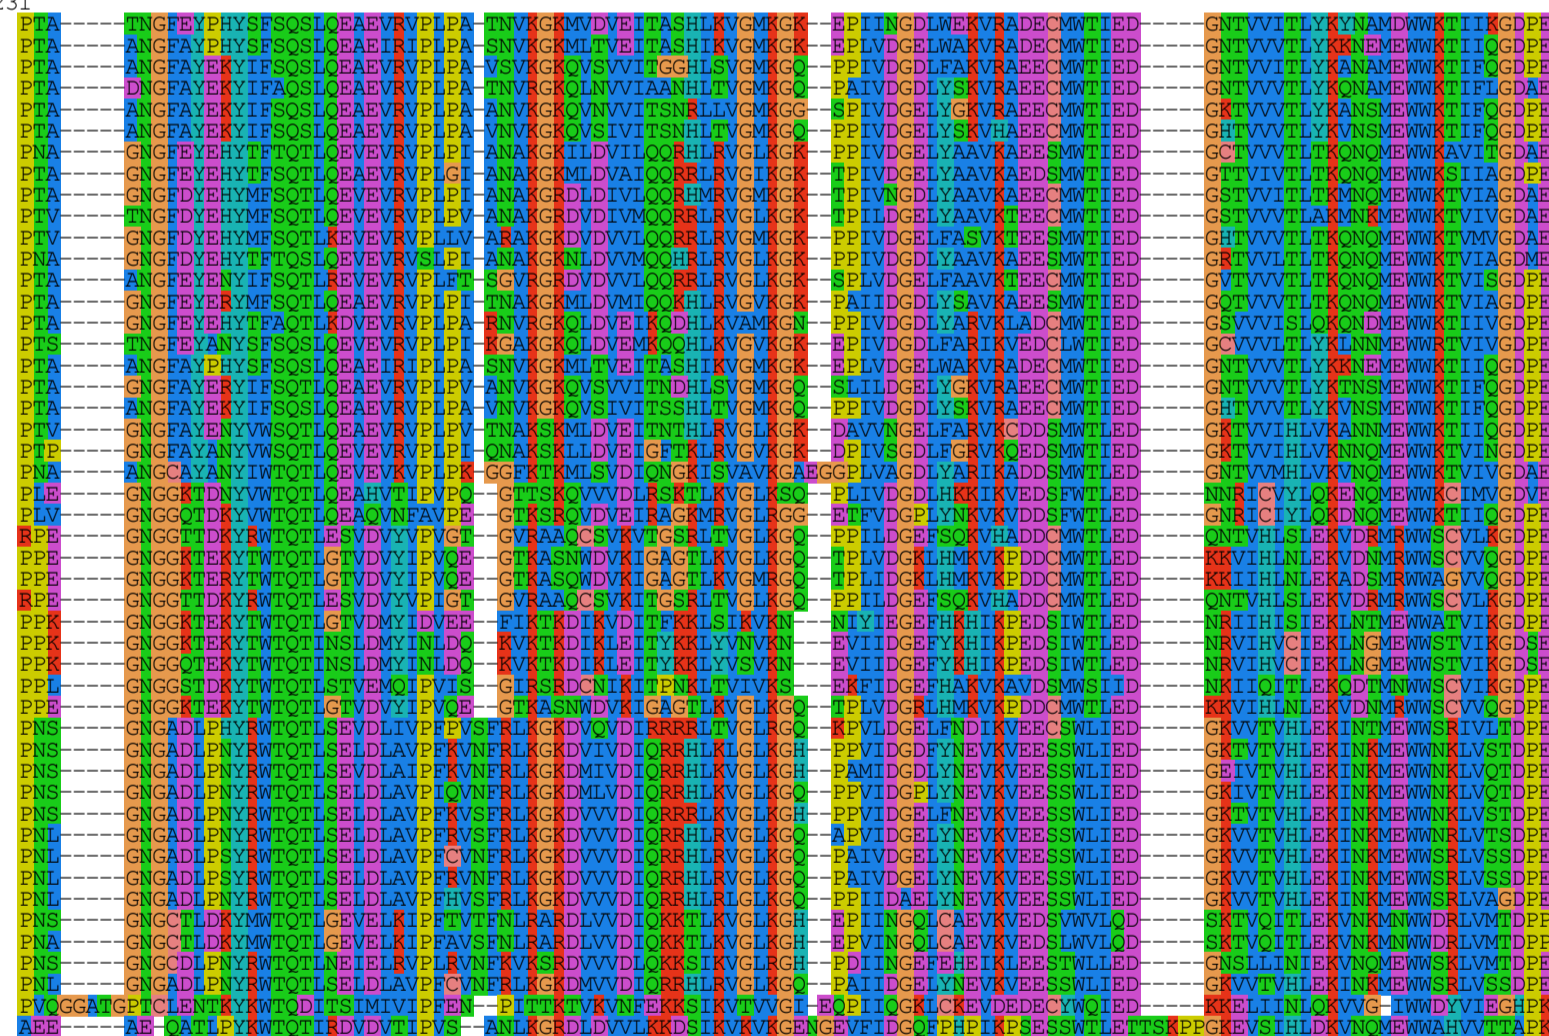

Angomonas desouzai  
Angomonas deanei  
Leptomonas costaricensis  
Crithidia fasciculata  
Leishmania braziliensis  
Leishmania mexicana  
Trypanosoma ralphi  
Trypanosoma sp TCC878  
Trypanosoma cruzi  
Trypanosoma lewisi  
Trypanosoma brucei  
Trypanosoma grayi  
Trypanosoma vivax  
Trypanosoma sp TCC339  
Phytomonas serpens  
Herpetomonas muscarum  
Angomonas deanei  
Endotrypanum schaudinni  
Leishmania major  
Bodo saltans  
Bodo sp  
ParaBodo caudatus  
XP\_008879598.1|Aphanomyces  
ETL31708.1|Phytophthora  
XP\_013233790.1|Eimeria tenella  
XP\_002368217.1|Toxoplasma gondii  
XP\_003883577.1|Neospora caninum  
XP\_013436709.1|Eimeria necatrix  
XP\_726864.1|Plasmodium yoelii  
XP\_008815682.1|Plasmodium inui  
XP\_002259979.1|Plasmodium knowlesi  
XP\_002141127.1|Cryptosporidium muris  
XP\_008882748.1|Hammondia hammondi  
NP\_001084961.1|Xenopus laevis  
XP\_006270261.2|Alligator mississippiensis  
XP\_015264922.1|Gekko japonicus  
XP\_003227510.1|Anolis carolinensis  
XP\_005427196.1|Geospiza fortis  
NP\_058967.1|Rattus norvegicus  
NP\_001069075.1|Bos taurus  
XP\_006055533.1|Bubalus bubalis  
XP\_004478818.1|Dasyus novemcinctus  
XP\_013115147.1|Stomoxys calcitrans  
XP\_005181854.1|Musca domestica  
XP\_014239874.1|Cimex lectularius  
NP\_006591.1|Homo sapiens  
EFC40417.1|Naegleria gruberi  
P17624.1|Aspergillus nidulans

346

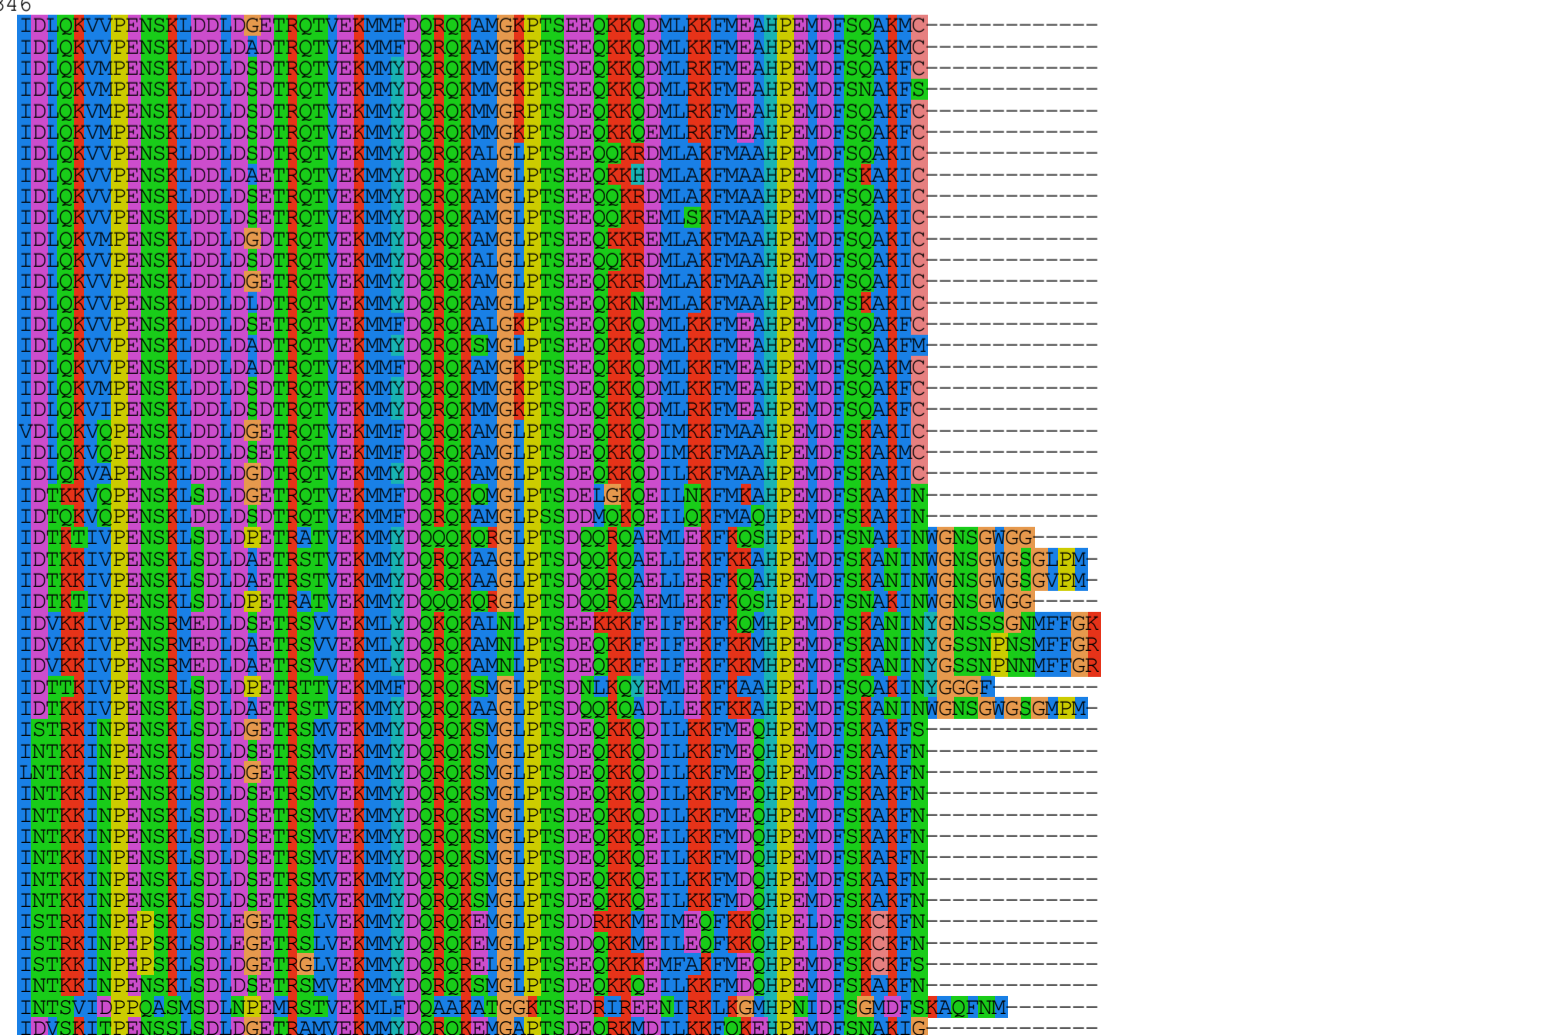



TryACDp

1

Herpetomonas muscarum  
Phytomonas sp Hartl  
Phytomonas sp TCC066E  
Phytomonas sp TCC418  
Phytomonas sp EMI  
Phytomonas serpens  
Angomonas desouzai  
Angomonas deanei  
Strigomonas culicis  
Strigomonas oncopelti  
Strigomonas galati  
Leptomonas costaricensis  
Leptomonas sp TCC2547  
Leptomonas sp TCC2441  
Crithidia fasciculata  
Crithidia acantoccephali  
Crithidia lucilliae thermophila  
Endotrypanum schaudinni  
Endotrypanum monterogeii  
Leishmania braziliensis  
Leishmania panamensis  
Leishmania tarentolae  
Leishmania arabica  
Leishmania donovani  
Leishmania infantum  
Leishmania aethiopica  
Leishmania tropica  
Leishmania major  
Leishmania gerbilli  
Leishmania turanica  
Leishmania amazonensis  
Leishmania mexicana  
Leishmania martiniquensis  
Leishmania enriettii  
Trypanosoma sp TCC2186  
Trypanosoma sp TCC1307  
Trypanosoma sp TCC339  
Trypanosoma sp TCC878  
Trypanosoma sp TCC878  
Trypanosoma congolense  
Trypanosoma brucei T  
Trypanosoma brucei T  
Trypanosoma brucei gambiense  
Trypanosoma evansi  
Trypanosoma theileri  
Trypanosoma cyclops  
Trypanosoma ralphii  
Trypanosoma grayi  
Trypanosoma lewisi  
Trypanosoma livingstonei  
Trypanosoma wauwau  
Trypanosoma rangeli AM80  
Trypanosoma conorhini  
Trypanosoma sp H25  
Trypanosoma cruzi G  
Trypanosoma cruzi marinkellei B7  
Trypanosoma erneyi  
Trypanosoma dionisii  
Parabodo caudatus  
Parabodo caudatus  
Bodo sp  
Bodo saltans

|                |           |        |   |                                       |
|----------------|-----------|--------|---|---------------------------------------|
| MSEPVSLVGEAVLV | MSDSVLPPG | ASSAAB | P | KKTINNSYYYWHGHEKERRAAVGDVAPMPVFMVSKDE |
| MSEVFLVDQEAVLV | MSEEPKQAP | ASSAAB | D | PKTINSYYYWHGHEKERRAAVGDVAPMPVFMVSKDE  |
| MSEVFLVDQEAVLV | MSEEPKQAP | ASSAAB | D | RKNSSSYYYWHGHEKERRAAVGDVAPMPVFMVSKDE  |
| MSEVFLVDQEAVLV | MSEEPKQAP | ASSAAB | D | PKNSSSYYYWHGHEKERRAAVGDVAPMPVFMVSKDE  |
| MSEVFLVDQEAVLV | MSEEPKQAP | ASSAAB | D | RKNSSSYYYWHGHEKERRAAVGDVAPMPVFMVSKDE  |

225

Herpetomonas muscarum  
Phytomonas sp Hartl  
Phytomonas sp TCC066E  
Phytomonas sp TCC418  
Phytomonas sp EMI  
Phytomonas serpens  
Angomonas desouzai  
Angomonas deanei  
Strigomonas culicis  
Strigomonas oncopelti  
Strigomonas galati  
Leptomonas costaricensis  
Leptomonas sp TCC2547  
Leptomonas sp TCC2441  
Crithidia fasciculata  
Crithidia acantoccephali  
Crithidia lucilliae thermophila  
Endotrypanum schaudinni  
Endotrypanum monterogeii  
Leishmania braziliensis  
Leishmania panamensis  
Leishmania tarentolae  
Leishmania arabica  
Leishmania donovani  
Leishmania infantum  
Leishmania aethiopica  
Leishmania tropica  
Leishmania major  
Leishmania gerbilli  
Leishmania turanica  
Leishmania amazonensis  
Leishmania mexicana  
Leishmania martiniquensis  
Leishmania enriettii  
Trypanosoma sp TCC2186  
Trypanosoma sp TCC1307  
Trypanosoma sp TCC339  
Trypanosoma sp TCC878  
Trypanosoma sp TCC878  
Trypanosoma congolense  
Trypanosoma brucei T  
Trypanosoma brucei T  
Trypanosoma brucei gambiense  
Trypanosoma evansi  
Trypanosoma theileri  
Trypanosoma cyclops  
Trypanosoma ralphii  
Trypanosoma grayi  
Trypanosoma lewisi  
Trypanosoma livingstonei  
Trypanosoma wauwau  
Trypanosoma rangeli AM80  
Trypanosoma conorhini  
Trypanosoma sp H25  
Trypanosoma cruzi G  
Trypanosoma cruzi marinkellei B7  
Trypanosoma erneyi  
Trypanosoma dionisii  
Parabodo caudatus  
Parabodo caudatus  
Bodo sp  
Bodo saltans

|                |           |        |   |                                       |
|----------------|-----------|--------|---|---------------------------------------|
| MSEVFLVDQEAVLV | MSDSVLPPG | ASSAAB | P | KKTINNSYYYWHGHEKERRAAVGDVAPMPVFMVSKDE |
| MSEVFLVDQEAVLV | MSEEPKQAP | ASSAAB | D | PKTINSYYYWHGHEKERRAAVGDVAPMPVFMVSKDE  |

249

Herpetomonas muscarum  
Phytomonas sp Hartl  
Phytomonas sp TCC066E  
Phytomonas sp TCC418  
Phytomonas sp EMI  
Phytomonas serpens  
Angomonas desouzai  
Angomonas deanei  
Strigomonas culicis  
Strigomonas oncopelti  
Strigomonas galati  
Leptomonas costaricensis  
Leptomonas sp TCC2547  
Leptomonas sp TCC2441  
Crithidia fasciculata  
Crithidia acantoccephali  
Crithidia lucilliae thermophila  
Endotrypanum schaudinni  
Endotrypanum monterogeii  
Leishmania braziliensis  
Leishmania panamensis  
Leishmania tarentolae  
Leishmania arabica  
Leishmania donovani  
Leishmania infantum  
Leishmania aethiopica  
Leishmania tropica  
Leishmania major  
Leishmania gerbilli  
Leishmania turanica  
Leishmania amazonensis  
Leishmania mexicana  
Leishmania martiniquensis  
Leishmania enriettii  
Trypanosoma sp TCC2186  
Trypanosoma sp TCC1307  
Trypanosoma sp TCC339  
Trypanosoma sp TCC878  
Trypanosoma sp TCC878  
Trypanosoma congolense  
Trypanosoma brucei T  
Trypanosoma brucei T  
Trypanosoma brucei gambiense  
Trypanosoma evansi  
Trypanosoma theileri  
Trypanosoma cyclops  
Trypanosoma ralphii  
Trypanosoma grayi  
Trypanosoma lewisi  
Trypanosoma livingstonei  
Trypanosoma wauwau  
Trypanosoma rangeli AM80  
Trypanosoma conorhini  
Trypanosoma sp H25  
Trypanosoma cruzi G  
Trypanosoma cruzi marinkellei B7  
Trypanosoma erneyi  
Trypanosoma dionisii  
Parabodo caudatus  
Parabodo caudatus  
Bodo sp  
Bodo saltans

|                |           |        |   |                                       |
|----------------|-----------|--------|---|---------------------------------------|
| MSEVFLVDQEAVLV | MSDSVLPPG | ASSAAB | P | KKTINNSYYYWHGHEKERRAAVGDVAPMPVFMVSKDE |
| MSEVFLVDQEAVLV | MSEEPKQAP | ASSAAB | D | PKTINSYYYWHGHEKERRAAVGDVAPMPVFMVSKDE  |

1

NP 991251.1 Danio
AH62564.1 Homo
Phytomona sp Hartl
Phytomona sp TCC418
Phytomona sp EMI
Phytomona serpens
Herpetomona muscarum
Cithidia fasciculata
C luciliae\_thermophila
Leptomona sp TCC2441
Cithidia acantocephali
Angomonas desouzai
Angomonas deanei
Strigomonas galati
Strigomonas culicis
Strigomonas oncopelti
Leptomonas costaricensis
Leptomonas sp TCC2547
Endotrypanum schaudinni
Endotrypanum monterogeii
L. brazilensis
L. panamensis
L. tarentolae
L. amazonensis
L. mexicana
L. donovani
L. infantum
L. aethiopia
L. tropica
L. major
L. gerbilli
L. arabica
L. turanica
L. martiniquensis
L. enriettii
T. congolense
T. sp TCC878
T. sp TCC1307
T. rangelii
T. brucei gambiense
T. evansi
T. vivax
T. sp TCC2186
T. sp TCC339
T. grayi
T. wauwau
T. livingstonei
T. sp H25
T. cruzi\_marinkellei\_B7
T. erneyi
T. donisii
T. conorhini
T. rangelii\_Am80
Pirabodo caudatus
Bodo sp

Multiple sequence alignment for block 1. Shows conserved regions in red, yellow, and green across various species. Key motifs are highlighted in color.

133

NP 991251.1 Danio
AH62564.1 Homo
Phytomona sp Hartl
Phytomona sp TCC418
Phytomona sp EMI
Phytomona serpens
Herpetomona muscarum
Cithidia fasciculata
C luciliae\_thermophila
Leptomonas sp TCC2441
Cithidia acantocephali
Angomonas desouzai
Angomonas deanei
Strigomonas galati
Strigomonas culicis
Strigomonas oncopelti
Leptomonas costaricensis
Leptomonas sp TCC2547
Endotrypanum schaudinni
Endotrypanum monterogeii
L. brazilensis
L. panamensis
L. tarentolae
L. amazonensis
L. mexicana
L. donovani
L. infantum
L. aethiopia
L. tropica
L. major
L. gerbilli
L. arabica
L. turanica
L. martiniquensis
L. enriettii
T. congolense
T. sp TCC878
T. sp TCC1307
T. rangelii
T. brucei gambiense
T. evansi
T. vivax
T. sp TCC2186
T. sp TCC339
T. grayi
T. wauwau
T. livingstonei
T. sp H25
T. cruzi\_marinkellei\_B7
T. erneyi
T. donisii
T. conorhini
T. rangelii\_Am80
Pirabodo caudatus
Bodo sp

Multiple sequence alignment for block 133. Similar to block 1, showing conserved motifs in red, yellow, and green.

265

NP 991251.1 Danio
AH62564.1 Homo
Phytomona sp Hartl
Phytomona sp TCC418
Phytomona sp EMI
Phytomona serpens
Herpetomona muscarum
Cithidia fasciculata
C luciliae\_thermophila
Leptomonas sp TCC2441
Cithidia acantocephali
Angomonas desouzai
Angomonas deanei
Strigomonas galati
Strigomonas culicis
Strigomonas oncopelti
Leptomonas costaricensis
Leptomonas sp TCC2547
Endotrypanum schaudinni
Endotrypanum monterogeii
L. brazilensis
L. panamensis
L. tarentolae
L. amazonensis
L. mexicana
L. donovani
L. infantum
L. aethiopia
L. tropica
L. major
L. gerbilli
L. arabica
L. turanica
L. martiniquensis
L. enriettii
T. congolense
T. sp TCC878
T. sp TCC1307
T. rangelii
T. brucei gambiense
T. evansi
T. vivax
T. sp TCC2186
T. sp TCC339
T. grayi
T. wauwau
T. livingstonei
T. sp H25
T. cruzi\_marinkellei\_B7
T. erneyi
T. donisii
T. conorhini
T. rangelii\_Am80
Pirabodo caudatus
Bodo sp

Multiple sequence alignment for block 265. Shows conserved motifs in red, yellow, and green.

397

NP 991251.1 Danio
AH62564.1 Homo
Phytomona sp Hartl
Phytomona sp TCC418
Phytomona sp EMI
Phytomona serpens
Herpetomona muscarum
Cithidia fasciculata
C luciliae\_thermophila
Leptomonas sp TCC2441
Cithidia acantocephali
Angomonas desouzai
Angomonas deanei
Strigomonas galati
Strigomonas culicis
Strigomonas oncopelti
Leptomonas costaricensis
Leptomonas sp TCC2547
Endotrypanum schaudinni
Endotrypanum monterogeii
L. brazilensis
L. panamensis
L. tarentolae
L. amazonensis
L. mexicana
L. donovani
L. infantum
L. aethiopia
L. tropica
L. major
L. gerbilli
L. arabica
L. turanica
L. martiniquensis
L. enriettii
T. congolense
T. sp TCC878
T. sp TCC1307
T. rangelii
T. brucei gambiense
T. evansi
T. vivax
T. sp TCC2186
T. sp TCC339
T. grayi
T. wauwau
T. livingstonei
T. sp H25
T. cruzi\_marinkellei\_B7
T. erneyi
T. donisii
T. conorhini
T. rangelii\_Am80
Pirabodo caudatus
Bodo sp

Multiple sequence alignment for block 397. Shows conserved motifs in red, yellow, and green.

529

NP 991251.1 Danio
AH62564.1 Homo
Phytomona sp Hartl
Phytomona sp TCC418
Phytomona sp EMI
Phytomona serpens
Herpetomona muscarum
Cithidia fasciculata
C luciliae\_thermophila
Leptomonas sp TCC2441
Cithidia acantocephali
Angomonas desouzai
Angomonas deanei
Strigomonas galati
Strigomonas culicis
Strigomonas oncopelti
Leptomonas costaricensis
Leptomonas sp TCC2547
Endotrypanum schaudinni
Endotrypanum monterogeii
L. brazilensis
L. panamensis
L. tarentolae
L. amazonensis
L. mexicana
L. donovani
L. infantum
L. aethiopia
L. tropica
L. major
L. gerbilli
L. arabica
L. turanica
L. martiniquensis
L. enriettii
T. congolense
T. sp TCC878
T. sp TCC1307
T. rangelii
T. brucei gambiense
T. evansi
T. vivax
T. sp TCC2186
T. sp TCC339
T. grayi
T. wauwau
T. livingstonei
T. sp H25
T. cruzi\_marinkellei\_B7
T. erneyi
T. donisii
T. conorhini
T. rangelii\_Am80
Pirabodo caudatus
Bodo sp

Multiple sequence alignment for block 529. Shows conserved motifs in red, yellow, and green.

661

NP 991251.1 Danio
AH62564.1 Homo
Phytomona sp Hartl
Phytomona sp TCC418
Phytomona sp EMI
Phytomona serpens
Herpetomona muscarum
Cithidia fasciculata
C luciliae\_thermophila
Leptomonas sp TCC2441
Cithidia acantocephali
Angomonas desouzai
Angomonas deanei
Strigomonas galati
Strigomonas culicis
Strigomonas oncopelti
Leptomonas costaricensis
Leptomonas sp TCC2547
Endotrypanum schaudinni
Endotrypanum monterogeii
L. brazilensis
L. panamensis
L. tarentolae
L. amazonensis
L. mexicana
L. donovani
L. infantum
L. aethiopia
L. tropica
L. major
L. gerbilli
L. arabica
L. turanica
L. martiniquensis
L. enriettii
T. congolense
T. brucei gambiense
T. evansi
T. vivax
T. sp TCC2186
T. sp TCC339
T. grayi
T. wauwau
T. livingstonei
T. sp H25
T. cruzi\_marinkellei\_B7
T. erneyi
T. donisii
T. conorhini
T. rangelii\_Am80
Pirabodo caudatus
Bodo sp

Multiple sequence alignment for block 661. Shows conserved motifs in red, yellow, and green.

793

NP 991251.1 Danio
AH62564.1 Homo
Phytomona sp Hartl
Phytomona sp TCC418
Phytomona sp EMI
Phytomona serpens
Herpetomona muscarum
Cithidia fasciculata
C luciliae\_thermophila
Leptomonas sp TCC2441
Cithidia acantocephali
Angomonas desouzai
Angomonas deanei
Strigomonas galati
Strigomonas culicis
Strigomonas oncopelti
Leptomonas costaricensis
Leptomonas sp TCC2547
Endotrypanum schaudinni
Endotrypanum monterogeii
L. brazilensis
L. panamensis
L. tarentolae
L. amazonensis
L. mexicana
L. donovani
L. infantum
L. aethiopia
L. tropica
L. major
L. gerbilli
L. arabica
L. turanica
L. martiniquensis
L. enriettii
T. congolense
T. brucei gambiense
T. evansi
T. vivax
T. sp TCC2186
T. sp TCC339
T. grayi
T. wauwau
T. livingstonei
T. sp H25
T. cruzi\_marinkellei\_B7
T. erneyi
T. donisii
T. conorhini
T. rangelii\_Am80
Pirabodo caudatus
Bodo sp

Multiple sequence alignment for block 793. Shows conserved motifs in red, yellow, and green.

1  
 NP\_001124384.1 Homo sapiens MAAAGAGLANSRPFQSFSDALDDPDAALAEI...  
 NP\_192865.1 Arabidopsis thaliana MAELAEAKRFAEFLDDDDVAVDLYSKAID...  
 HePetomonas muscarum  
 Phytomonas sp TCC418  
 Phytomonas sp Hart1  
 Phytomonas sp Hart1  
 Phytomonas serpens  
 Phytomonas sp TCC066E  
 Angomonas desouzai  
 Angomonas deanei  
 Strigomonas culicis  
 Strigomonas oncolyti  
 Strigomonas galati  
 Leptomonas costaricensis  
 Leptomonas sp TCC2547  
 Crithidia fasciculata  
 Leptomonas sp TCC2441  
 Crithidia luciliae thermophila  
 Crithidia acantocephali  
 Endotrypanum schaudinni  
 Endotrypanum monterogei  
 Leishmania tarentolae  
 Leishmania braziliensis  
 Leishmania panamensis  
 Leishmania guianensis  
 Leishmania martiniquensis  
 Leishmania amazonensis  
 Leishmania mexicana  
 Leishmania donovani  
 Leishmania infantum  
 Leishmania gerbilli  
 Leishmania arabica  
 Leishmania turanica  
 Leishmania major  
 Leishmania aethiopia  
 Leishmania tropica  
 Trypanosoma vivax  
 Trypanosoma serpentis  
 Trypanosoma congolense  
 Trypanosoma brucei gambiense  
 Trypanosoma brucei T  
 Trypanosoma evansi  
 Trypanosoma cyclops  
 Trypanosoma theileri  
 Trypanosoma sp TCC1307  
 Trypanosoma sp TCC878  
 Trypanosoma sp TCC878  
 Trypanosoma ralphii  
 Trypanosoma grayi  
 Trypanosoma sp TCC2186  
 Trypanosoma sp TCC339  
 Trypanosoma lewisi  
 Trypanosoma livingstonei  
 Trypanosoma wauwau  
 Trypanosoma sp H25  
 Trypanosoma cruzi G  
 Trypanosoma cruzi marinkellei B7  
 Trypanosoma erneyi  
 Trypanosoma dionisii  
 Trypanosoma rangeli AM80  
 Trypanosoma conorhina  
 Bodo sp  
 Bodo saltans  
 Parabodo caudatus

249  
 NP\_001124384.1 Homo sapiens VPKRREAVWIKRLEGGD...  
 NP\_192865.1 Arabidopsis thaliana RLAAAEIITWASLEVGCG...  
 HePetomonas muscarum  
 Phytomonas sp TCC418  
 Phytomonas sp Hart1  
 Phytomonas sp Hart1  
 Phytomonas serpens  
 Phytomonas sp TCC066E  
 Angomonas desouzai  
 Angomonas deanei  
 Strigomonas culicis  
 Strigomonas oncolyti  
 Strigomonas galati  
 Leptomonas costaricensis  
 Leptomonas sp TCC2547  
 Crithidia fasciculata  
 Leptomonas sp TCC2441  
 Crithidia luciliae thermophila  
 Crithidia acantocephali  
 Endotrypanum schaudinni  
 Endotrypanum monterogei  
 Leishmania tarentolae  
 Leishmania braziliensis  
 Leishmania panamensis  
 Leishmania guianensis  
 Leishmania martiniquensis  
 Leishmania amazonensis  
 Leishmania mexicana  
 Leishmania donovani  
 Leishmania infantum  
 Leishmania gerbilli  
 Leishmania arabica  
 Leishmania turanica  
 Leishmania major  
 Leishmania aethiopia  
 Leishmania tropica  
 Trypanosoma vivax  
 Trypanosoma serpentis  
 Trypanosoma congolense  
 Trypanosoma brucei gambiense  
 Trypanosoma brucei T  
 Trypanosoma evansi  
 Trypanosoma cyclops  
 Trypanosoma theileri  
 Trypanosoma sp TCC1307  
 Trypanosoma sp TCC878  
 Trypanosoma sp TCC878  
 Trypanosoma ralphii  
 Trypanosoma grayi  
 Trypanosoma sp TCC2186  
 Trypanosoma sp TCC339  
 Trypanosoma lewisi  
 Trypanosoma livingstonei  
 Trypanosoma wauwau  
 Trypanosoma sp H25  
 Trypanosoma cruzi G  
 Trypanosoma cruzi marinkellei B7  
 Trypanosoma erneyi  
 Trypanosoma dionisii  
 Trypanosoma rangeli AM80  
 Trypanosoma conorhina  
 Bodo sp  
 Bodo saltans  
 Parabodo caudatus

373  
 NP\_001124384.1 Homo sapiens DVGKRRVLEINPPDDMEKKV...  
 NP\_192865.1 Arabidopsis thaliana EVGKIKVEAAPPDMEIKKVE...  
 HePetomonas muscarum  
 Phytomonas sp TCC418  
 Phytomonas sp Hart1  
 Phytomonas sp Hart1  
 Phytomonas serpens  
 Phytomonas sp TCC066E  
 Angomonas desouzai  
 Angomonas deanei  
 Strigomonas culicis  
 Strigomonas oncolyti  
 Strigomonas galati  
 Leptomonas costaricensis  
 Leptomonas sp TCC2547  
 Crithidia fasciculata  
 Leptomonas sp TCC2441  
 Crithidia luciliae thermophila  
 Crithidia acantocephali  
 Endotrypanum schaudinni  
 Endotrypanum monterogei  
 Leishmania tarentolae  
 Leishmania braziliensis  
 Leishmania panamensis  
 Leishmania guianensis  
 Leishmania martiniquensis  
 Leishmania amazonensis  
 Leishmania mexicana  
 Leishmania donovani  
 Leishmania infantum  
 Leishmania gerbilli  
 Leishmania arabica  
 Leishmania turanica  
 Leishmania major  
 Leishmania aethiopia  
 Leishmania tropica  
 Trypanosoma vivax  
 Trypanosoma serpentis  
 Trypanosoma congolense  
 Trypanosoma brucei gambiense  
 Trypanosoma brucei T  
 Trypanosoma evansi  
 Trypanosoma cyclops  
 Trypanosoma theileri  
 Trypanosoma sp TCC1307  
 Trypanosoma sp TCC878  
 Trypanosoma sp TCC878  
 Trypanosoma ralphii  
 Trypanosoma grayi  
 Trypanosoma sp TCC2186  
 Trypanosoma sp TCC339  
 Trypanosoma lewisi  
 Trypanosoma livingstonei  
 Trypanosoma wauwau  
 Trypanosoma sp H25  
 Trypanosoma cruzi G  
 Trypanosoma cruzi marinkellei B7  
 Trypanosoma erneyi  
 Trypanosoma dionisii  
 Trypanosoma rangeli AM80  
 Trypanosoma conorhina  
 Bodo sp  
 Bodo saltans  
 Parabodo caudatus

Tryp23A

Table listing protein sequences for Tryp23A from various species including Leishmania, Trypanosoma, and Bsaltrans.

125

Sequence alignment visualization for Tryp23A, showing conserved regions across species with color-coded amino acid blocks.

249

Sequence alignment visualization for Tryp23A, continuing from the previous alignment with color-coded amino acid blocks.



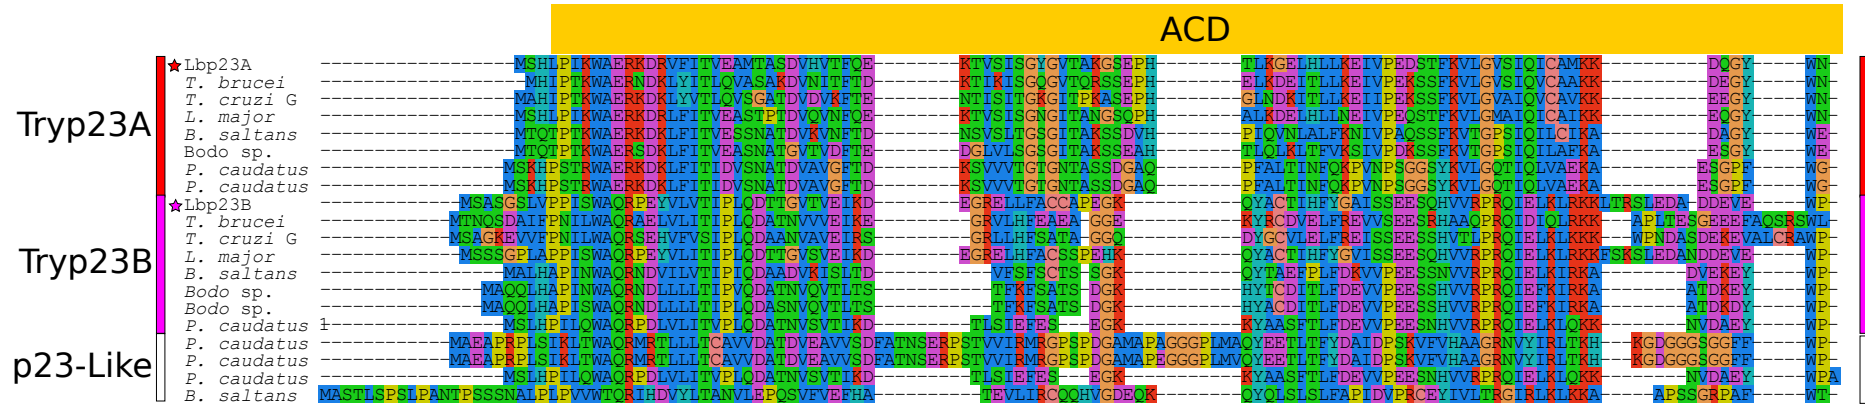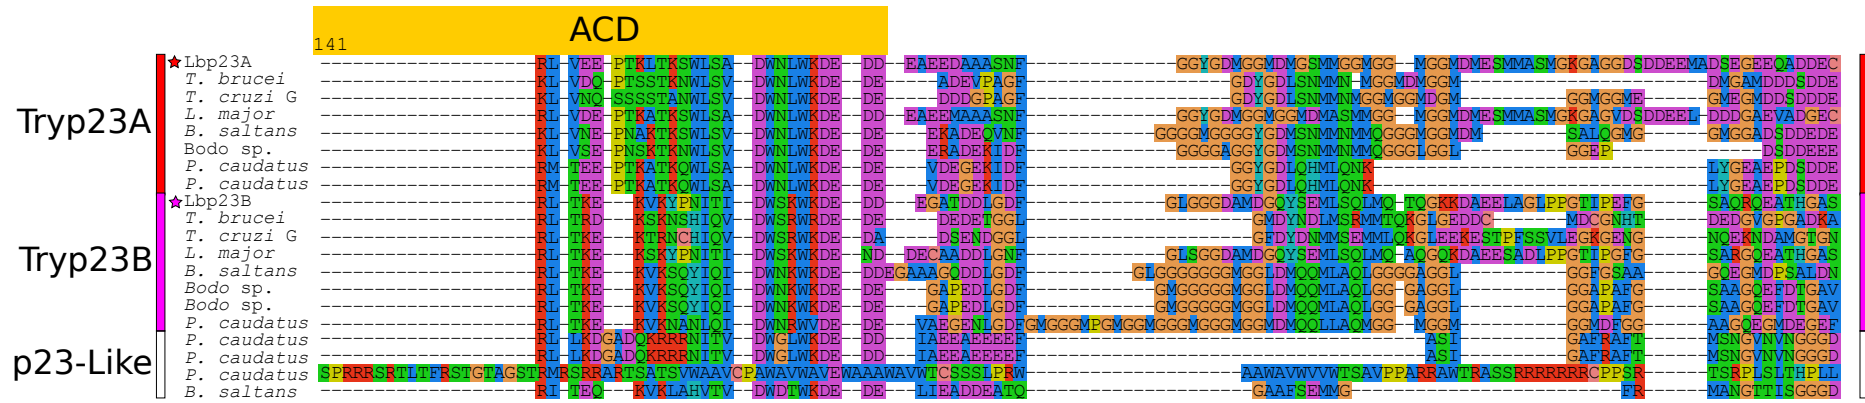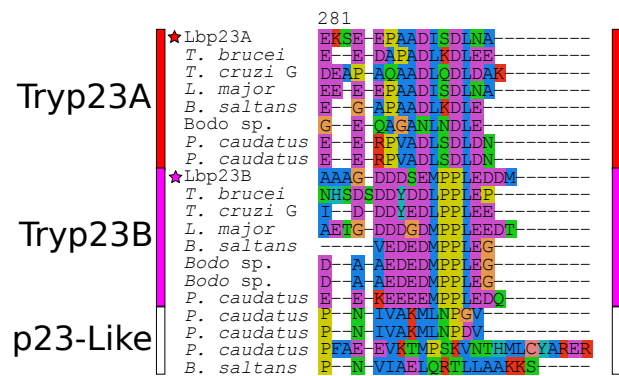

Supplement: pone.0206012.s007.pdf [file pone.0206012.s007.pdf]
