# Supplementary material for: Genome-wide identification of evolutionarily conserved Small Heat-Shock and eight other proteins bearing α-crystallin domain-like in kinetoplastid protists
Source: PubMed Central journal article supplement (PMC6197667; doi:10.1371/journal.pone.0206012), 2018-10-22

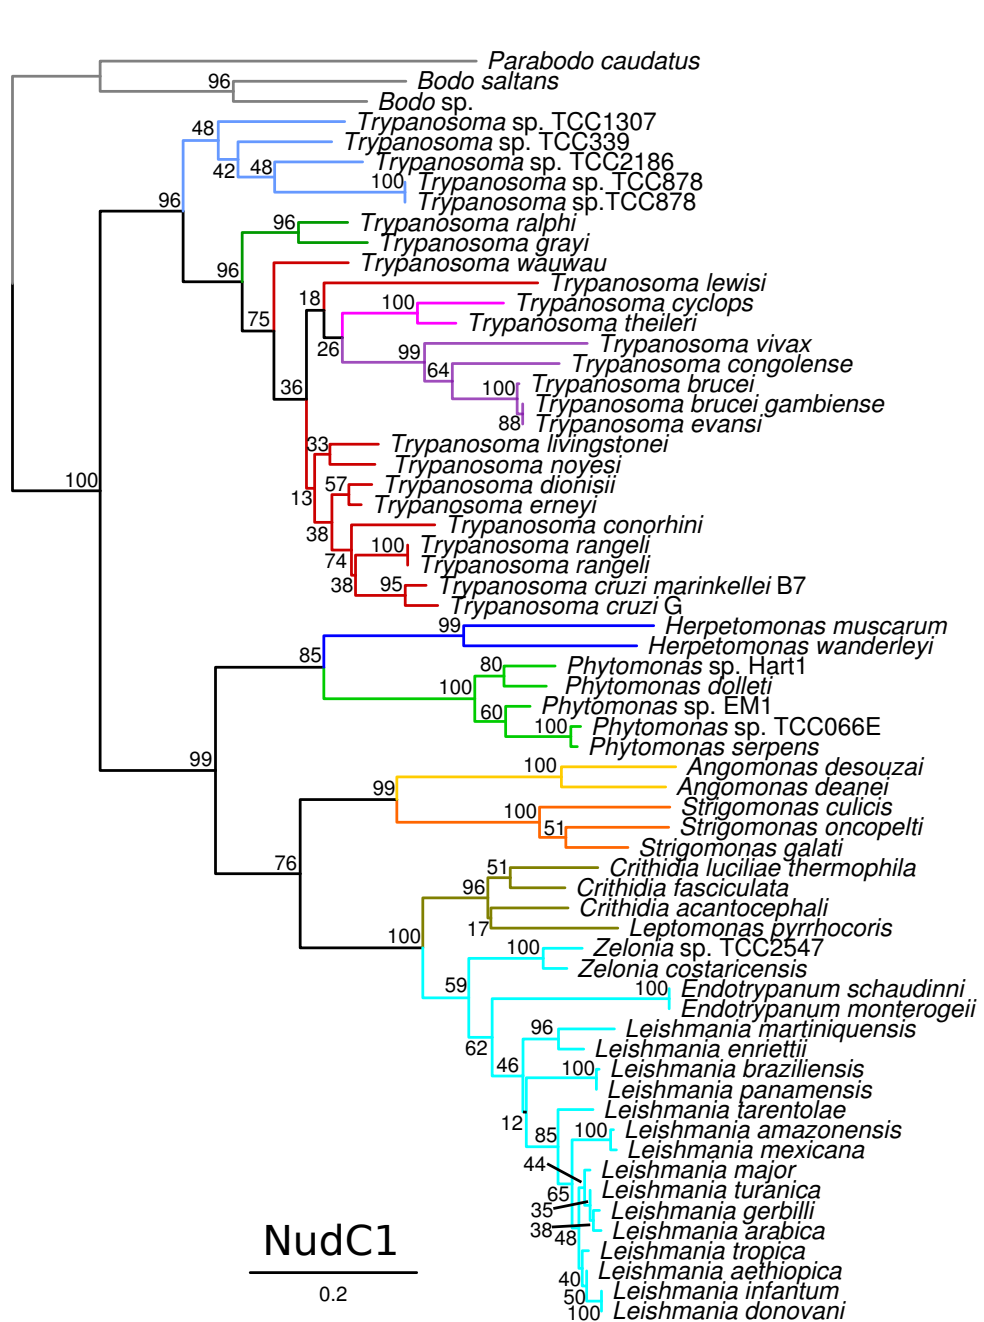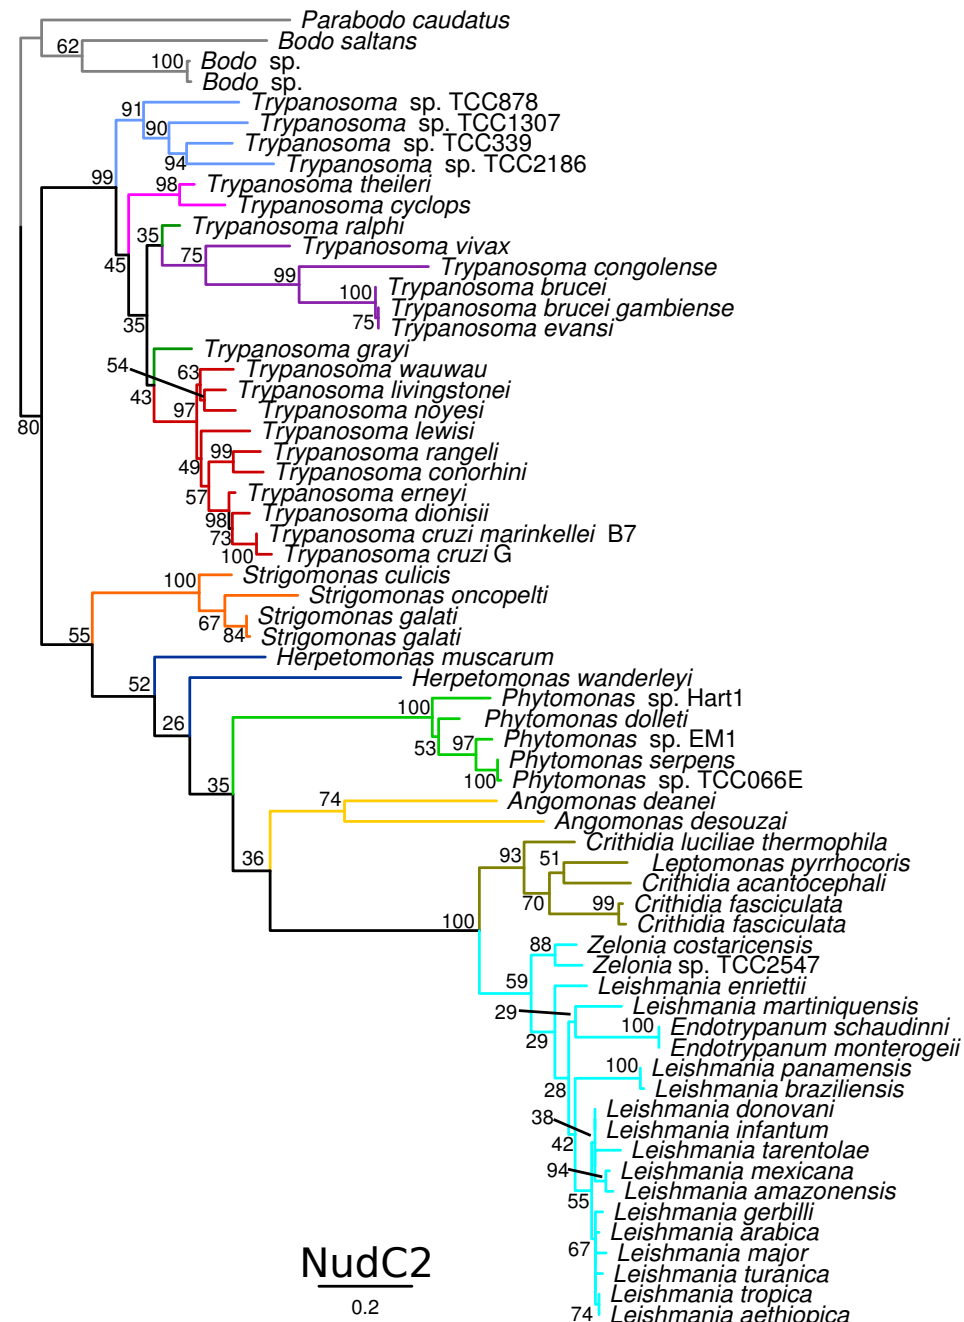

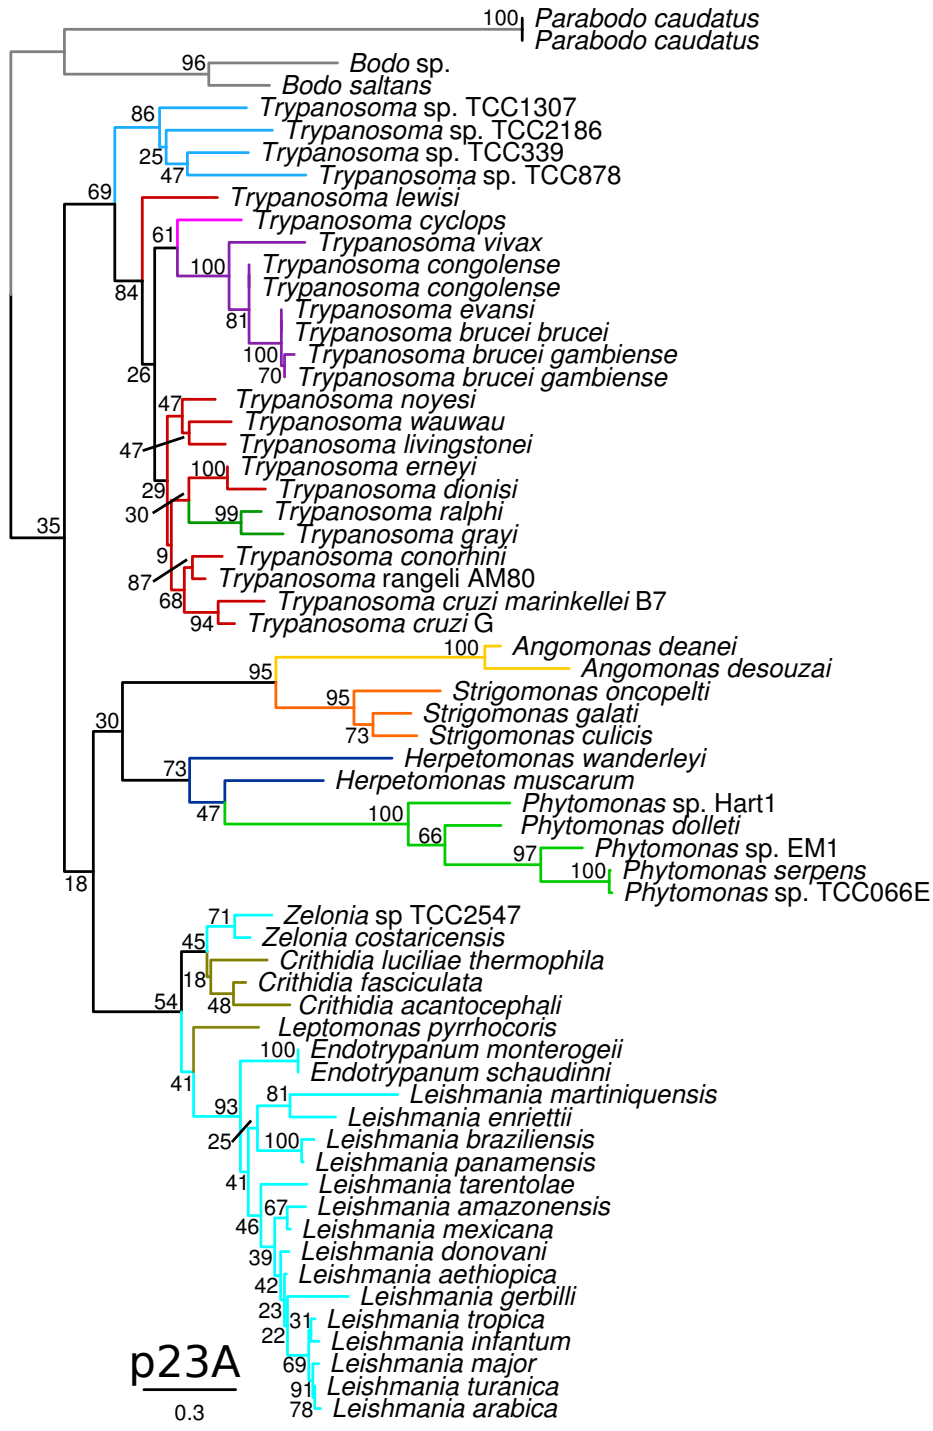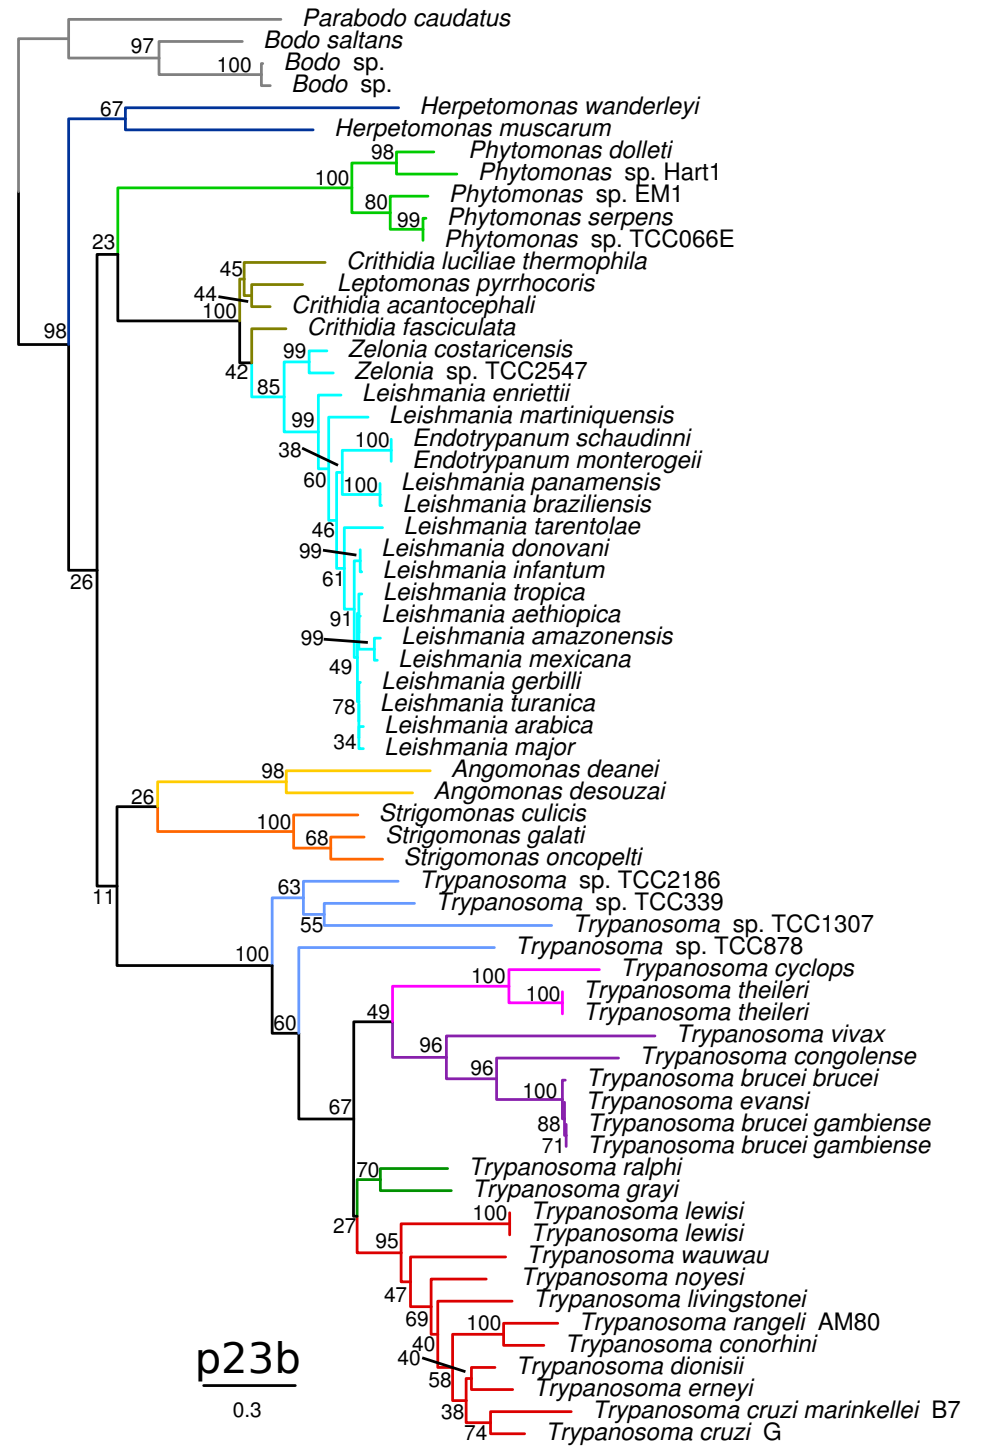

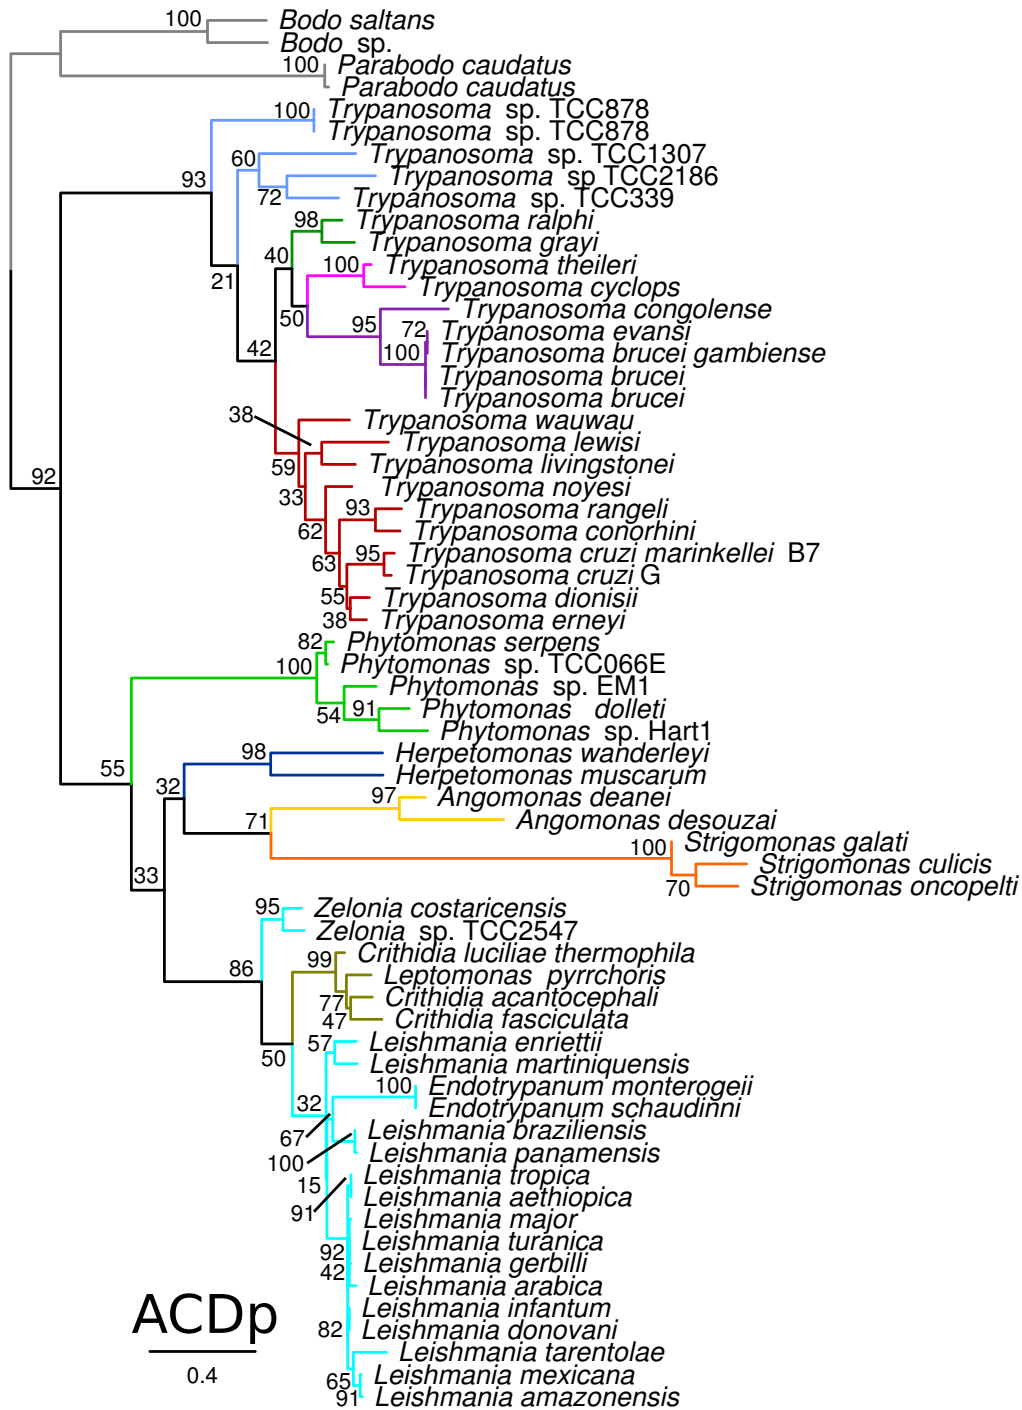

Supplement: pone.0206012.s008.pdf [file pone.0206012.s008.pdf]
